# Supplementary material for: Validation of the mortality in emergency department sepsis (MEDS) score in a Singaporean cohort
Source: PubMed Central journal article supplement — Medicine (Baltimore). 2019 Aug 23;98(34):e16962. doi: 10.1097/MD.0000000000016962 (PMC6716723; doi:10.1097/md.0000000000016962), 2019-08-23
Supplement: medi-98-e16962-s001.pdf [file medi-98-e16962-s001.pdf]

## Appendix

### Variables required for the calculation of disease severity scores.

|                                         | MEDS | APACHE II | SOFA |
|-----------------------------------------|------|-----------|------|
| Age                                     | ✓    | ✓         |      |
| Nursing home resident                   | ✓    |           |      |
| Chronic health problems                 |      | ✓         |      |
| Terminal illness                        | ✓    |           |      |
| Heart rate                              |      | ✓         |      |
| Blood pressure                          | ✓    | ✓         | ✓    |
| Respiratory rate / supplementary oxygen | ✓    | ✓         |      |
| Temperature                             |      | ✓         |      |
| PaO <sub>2</sub>                        |      | ✓         | ✓    |
| SpO <sub>2</sub>                        | ✓    |           |      |
| FiO <sub>2</sub>                        |      | ✓         | ✓    |
| Glasgow Coma Scale                      |      | ✓         | ✓    |
| Altered Mental Status                   | ✓    |           |      |
| Hematocrit                              |      | ✓         |      |
| White blood cell count                  |      | ✓         |      |
| Percentage bands on differential count  | ✓    |           |      |
| Platelet count                          | ✓    |           | ✓    |
| Serum sodium                            |      | ✓         |      |
| Serum potassium                         |      | ✓         |      |
| Serum creatinine                        |      | ✓         | ✓    |
| Arterial pH or serum bicarbonate        |      | ✓         |      |
| Serum bilirubin                         |      |           | ✓    |
| Suspicion of LRTI                       | ✓    |           |      |
| Septic shock                            | ✓    |           |      |
| Acute renal failure                     |      | ✓         |      |
| Use of vasopressors                     |      |           | ✓    |

APACHE II: Acute physiology and chronic health evaluation II; FiO<sub>2</sub>: Fraction of inspired oxygen; LRTI: Lower respiratory tract infection; MEDS: Mortality in emergency department sepsis; PaO<sub>2</sub>: Partial pressure of arterial oxygen; SOFA: Sequential organ failure assessment; SpO<sub>2</sub>: Peripheral capillary oxygen saturation.
